# Supplementary material for: The Transition from Type-I to Type-II SiC/GaN Heterostructure with External Strain
Source: MDPI journal article supplement (doi:10.3390/cryst14010030), 2023-12-27
Supplement: s1 [file s1]

## The Transition of Type-I to Type-II SiC/GaN Heterostructure by external strain

Li Zhang<sup>1</sup>, Haiyang Sun<sup>2</sup>, Ruxin Zheng<sup>3</sup>, Hao Pan<sup>4,\*</sup> and Li Wang<sup>5</sup>

<sup>1</sup>School of Electrical Engineering, Anhui Technical College of Mechanical and Electrical Engineering, Wuhu 241000, Anhui, China

<sup>2</sup>School of Information Science and Technology, Nanjing Forestry University, Nanjing 210037, China

<sup>3</sup>School of Mechanical Engineering, Southeast University, Nanjing, Jiangsu 211189, China

<sup>4</sup>Automotive & Transportation Engineering, Shenzhen Polytechnic, Shenzhen 518055, Guangdong, China

<sup>5</sup>Dean's office, Xuancheng Vocational & Technical College, Xuancheng 242000, Anhui, China

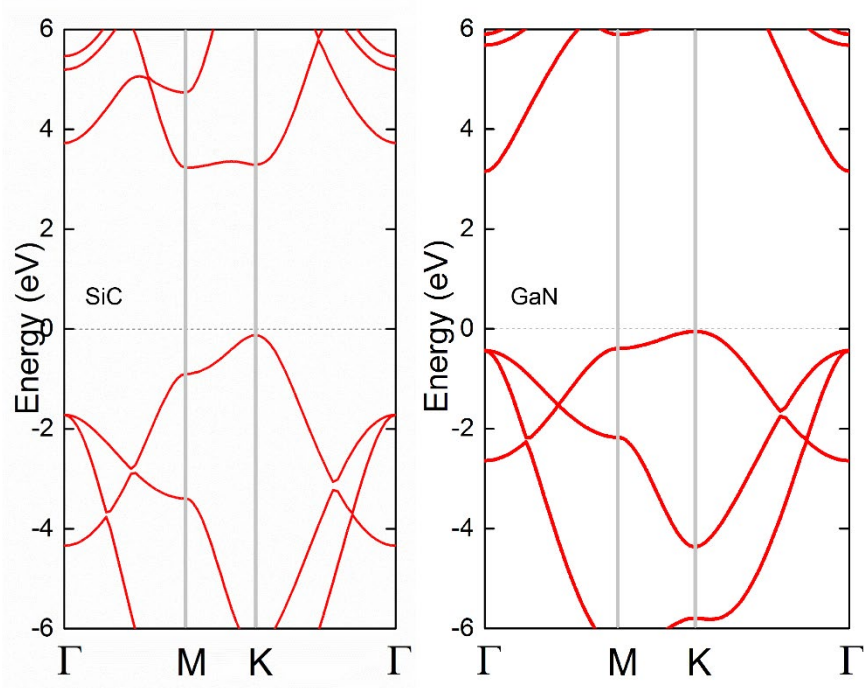

**Figure S1.** The band structure of the SiC and GaN monolayers calculated by HSE06 function.

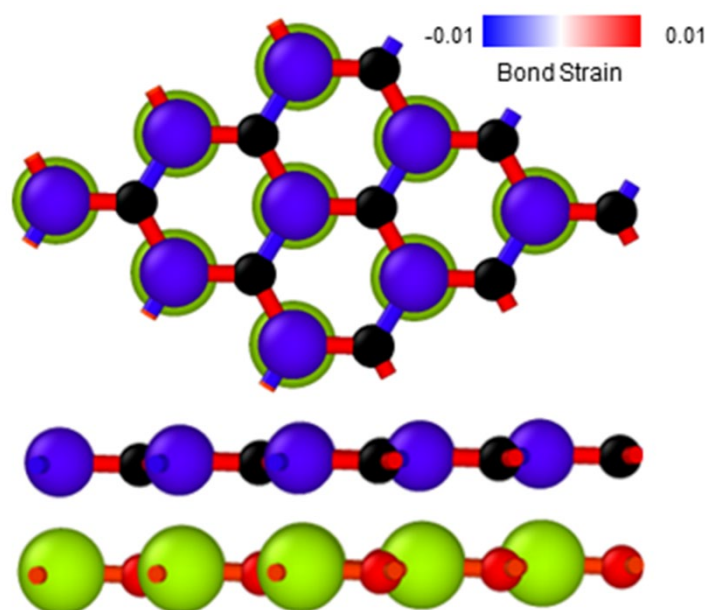

**Figure S2.** The bond strain of the SiC and GaN monolayers.
